# Supplementary material for: The new insight into the structure–activity relation of Pd/CeO2–ZrO2–Nd2O3 catalysts by Raman, in situ DRIFTS and XRD Rietveld analysis
Source: Royal Society of Chemistry journal article supplement (doi:10.1039/c5cp06956d), 2015-12-22
Supplement: c5cp06956d1.pdf [file c5cp06956d1.pdf]

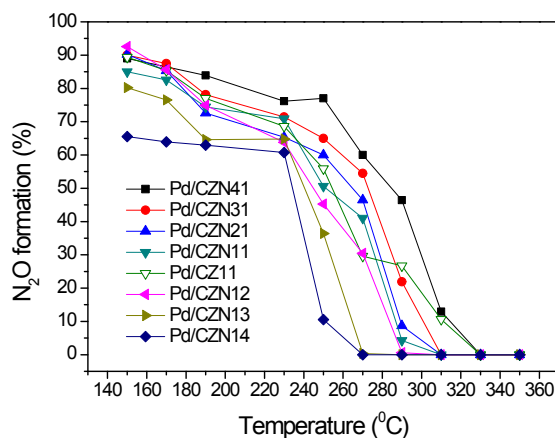

Fig. 1S The selectivity of N<sub>2</sub>O formation over the fresh catalysts.

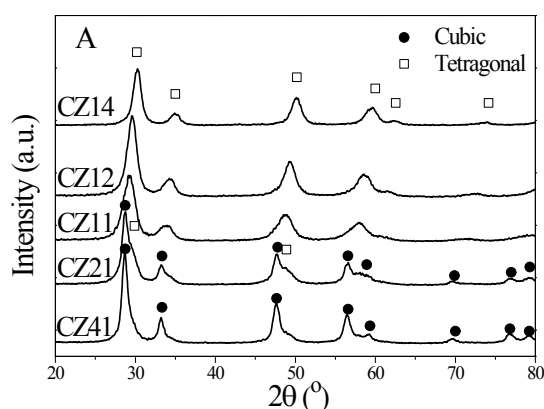

Fig. 2S XRD patterns of CZ supports calcined at 500 °C (A)

Table 1S Textural and structural properties of fresh CZ supports

| Sample | Lattice parameter (Å) | Phase      | Crystallite size (nm) |
|--------|-----------------------|------------|-----------------------|
| CZ41   | a=b=c=5.403           | cubic      | 8.8                   |
| CZ21   | a=b=c=5.409;          | cubic      | 10.7                  |
|        | a=b=3.708, c=5.343    | tetragonal | 4.9                   |
| CZ11   | a=b=3.726, c=5.294    | tetragonal | 4.5                   |
| CZ12   | a=b=3.679, c=5.273    | tetragonal | 5.0                   |
| CZ14   | a=b=3.625, c=5.218    | tetragonal | 6.7                   |

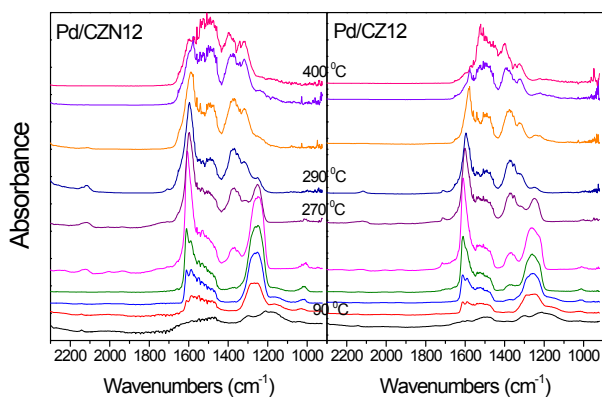

Fig. 3S DRIFTS spectra collected at different temperatures during exposure of fresh Pd/CZN12 and Pd/CZ12 catalysts to stoichiometric CO + HC + NO<sub>x</sub> + O<sub>2</sub> reaction conditions.
